# Supplementary material for: Template-free solution growth of highly regular, crystal orientation-ordered C60nanorod bundles
Source: Royal Society of Chemistry journal article supplement (doi:10.1039/b913897h), 2009-12-09
Supplement: b913897h.pdf [file b913897h.pdf]

## Supporting Information

### Template-Free Solution Growth of Highly Regular, Crystal Orientation-Ordered C<sub>60</sub> Nanorod Bundles

Yang Zhang<sup>a</sup>, Wei Liu<sup>b</sup>, Lang Jiang<sup>b</sup>, Louzhen Fan<sup>a\*</sup>, Chunru Wang<sup>b</sup>, Wenping Hu<sup>b</sup>, Haizheng Zhong<sup>b</sup>, Yongfang Li<sup>b</sup> and Shihe Yang<sup>c\*</sup>

<sup>a</sup>Department of Chemistry, Beijing Normal University, Beijing, China, 100875

<sup>b</sup>Center for Molecular Science, Institute of Chemistry, Chinese Academy of Sciences, Beijing, China, 100871

<sup>c</sup>Department of Chemistry, The Hong Kong University of Science and Technology, Clear Water Bay, Kowloon, Hong Kong

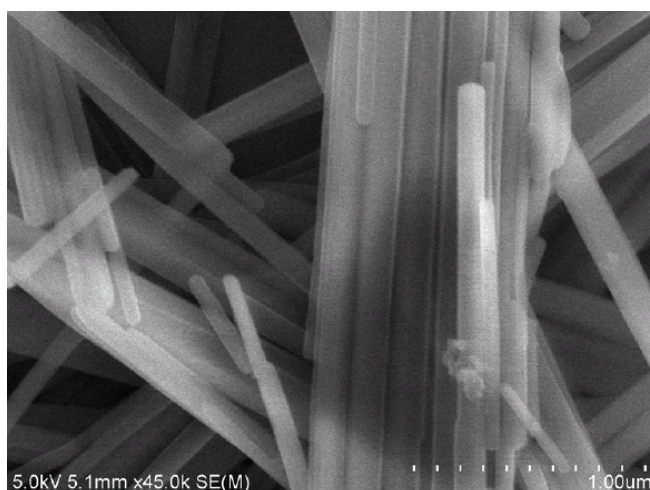

**Figure S1.** An SEM image shows that C<sub>60</sub> nanorods trend to stick together at the stage of initial precipitation at the liquid-liquid interface.

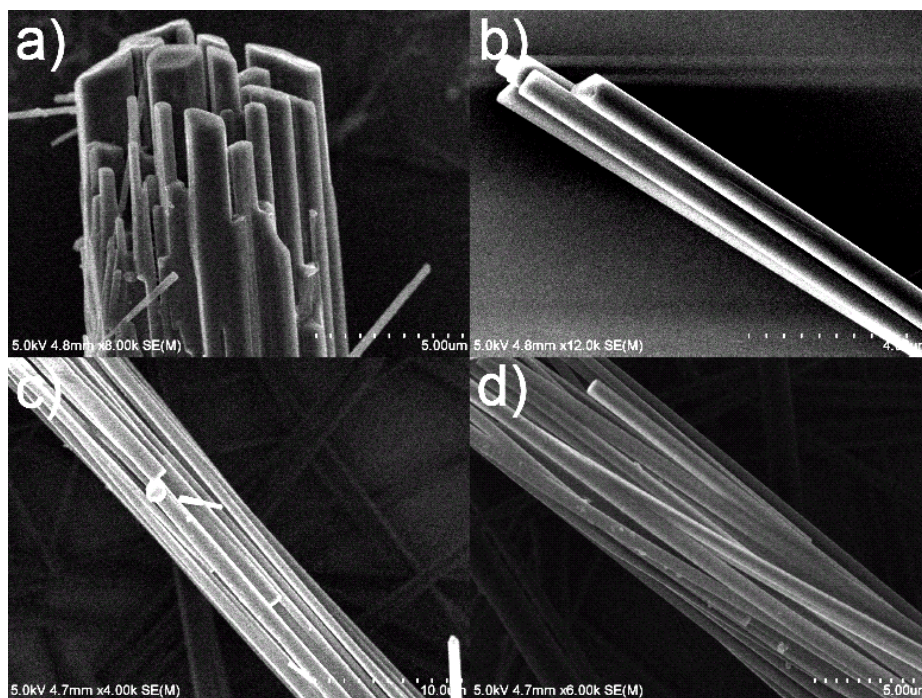

**Figure S2.** SEM images of  $C_{60}$  nanorod bundles obtained in IPA/toluene system: a) top view, b), c) and d): different dimensions of  $C_{60}$  nanorod bundles. These images demonstrate that even when *m*-xylene was changed to toluene,  $C_{60}$  nanorods were still formed and they also tended to bundle together once water was added into the IPA phase.

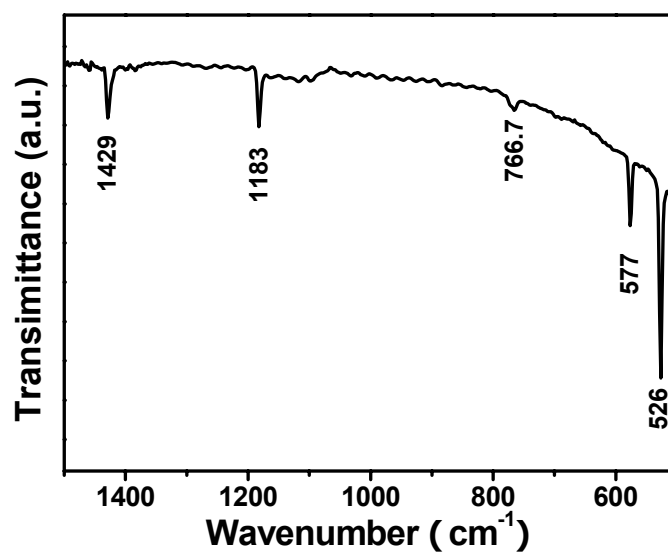

**Figure S3.** FTIR spectrum of  $C_{60}$  nanorod bundles, which shows that  $C_{60}$  molecules in the nanorod bundles were not polymerized.

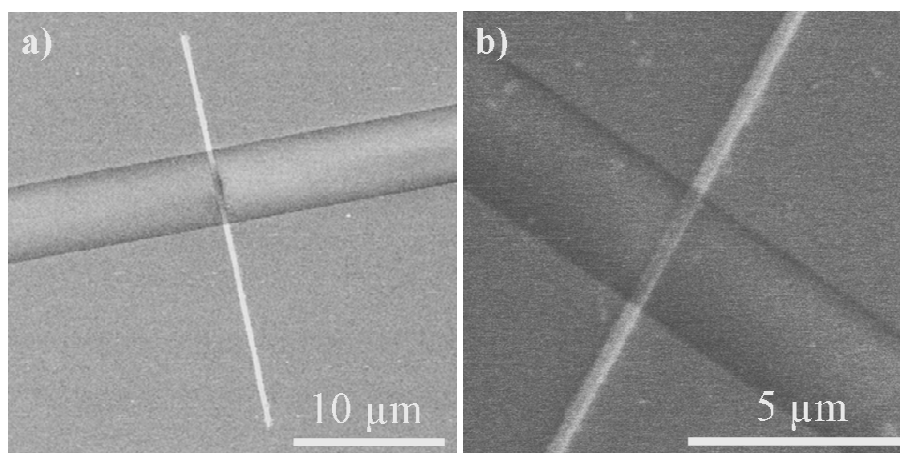

**Figure S4.** For the sake of comparison, photoswitches based on a single C<sub>60</sub> nanorod were also fabricated with different electrode configurations: Ag-Ag and Au-Au. (a) SEM image of Ag electrodes with a gap of 5 μm and a nanorod diameter of ~250 nm, and (b) SEM image of Au electrodes with a gap of 3 μm and a nanorod diameter of ~380 nm.

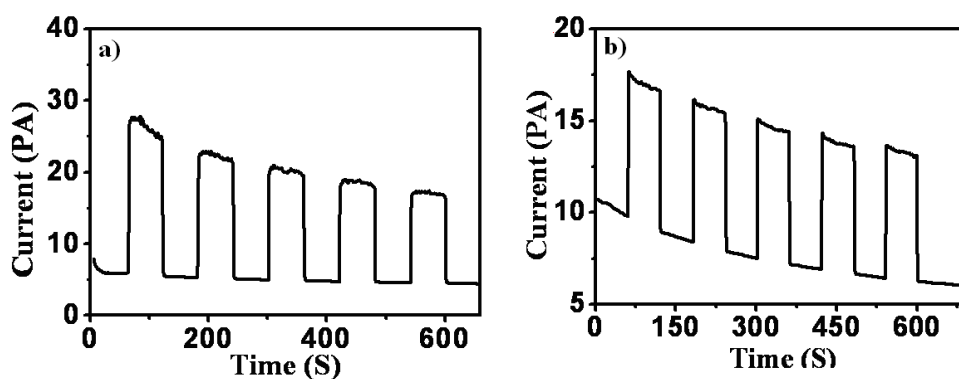

**Figure S5.** Photoresponse characteristics of the photoswitches fabricated from individual C<sub>60</sub> nanorods of Figure S4. (a) is Ag-Ag electrode and (b) is Au-Au electrode. Both kinds of photoswitches exhibited similar switching ratios, which are much less than 10, at least 2 orders of magnitude smaller than that of the C<sub>60</sub> nanorod bundles.
